# Supplementary material for: Non-Invasive Mapping for Effective Preoperative Guidance to Approach Highly Language-Eloquent Gliomas—A Large Scale Comparative Cohort Study Using a New Classification for Language Eloquence
Source: PubMed Central journal article supplement (PMC7827798; doi:10.3390/cancers13020207), 2021-01-08
Supplement: cancers-13-00207-s001.pdf [file cancers-13-00207-s001.pdf]

# Supplementary Materials: Non-Invasive Mapping for Effective Preoperative Guidance to Approach Highly Language-Eloquent Gliomas – A Large Scale Comparative Cohort Study Using a New Classification for Language Eloquence

Sebastian Ille, Axel Schroeder, Lucia Albers, Anna Kelm, Doris Droese, Bernhard Meyer and Sandro M. Krieg

Table S1. Baseline characteristics.

|                           |          | nrTMS     | Awake     | <i>p</i> -Value |
|---------------------------|----------|-----------|-----------|-----------------|
| Number of cases           |          | 100       | 47        |                 |
| Age                       | mean     | 55.8      | 49.2      | 0.0129          |
|                           | SD       | 15.6      | 14.1      |                 |
|                           | range    | 20-84     | 25-75     |                 |
| WHO I                     |          | 2 (2.0)   | 1 (2.1)   | 0.0929          |
| WHO II                    |          | 12 (12.0) | 8 (17.0)  |                 |
| WHO III                   |          | 17 (17.0) | 15 (31.9) |                 |
| WHO IV                    |          | 69 (69.0) | 23 (48.9) |                 |
| First                     |          | 63 (63.0) | 24 (51.1) | 0.2084          |
| Recurrent                 |          | 37 (37.0) | 23 (48.9) |                 |
| Lobe                      | frontal  | 42 (42.0) | 15 (31.9) | 0.0016          |
|                           | insular  | 13 (13.0) | 16 (34.0) |                 |
|                           | temporal | 21 (21.0) | 2 (4.3)   |                 |
|                           | parietal | 20 (20.0) | 14 (29.8) |                 |
|                           | right    | 4 (4.0)   |           |                 |
| % of base-line pictures   | mean     | 69.0      | 74.5      | 0.1442          |
|                           | SD       | 20.5      | 17.3      |                 |
| Standard picture data set |          | 93 (93.0) | 44 (93.6) | 1               |
| Alternative task          |          | 7 (7.0)   | 3 (6.4)   |                 |

The table shows the baseline characteristics of all included patients separated into the according groups.

Table S2. Comparison of outcome.

|          |              | nrTMS        | Awake        | <i>p</i> -Value |
|----------|--------------|--------------|--------------|-----------------|
| Outcome  | no new       | 71 (71.0)    | 28 (59.6)    | 0.0642          |
|          | transient    | 17 (17.0)    | 15 (31.9)    |                 |
|          | permanent    | 3 (3.0)      | 3 (6.4)      |                 |
| EOR      | complication | 9 (9.0)      | 1 (2.1)      | 0.0378          |
|          | GTR          | 87 (87.9)    | 34 (72.3)    |                 |
|          | STR          | 13 (13.1)    | 13 (27.7)    |                 |
| Duration | mean         | 209.9        | 268.4        | <0.0001         |
|          | SD           | 79.3         | 65.9         |                 |
| iMRI     |              | 30/58 (51.7) | 13/19 (68.4) | 0.2881          |

The table shows the clinical and radiological outcome as well as data on the course of surgeries of all included patients separated into the according groups. Transient language deficits were defined as new surgery-related aphasia as examined five days after surgery, but the new aphasia was not persistent three months after surgery. Permanent language deficits were defined as new surgery-related aphasia as examined five days after surgery and three months after surgery. The row complication describes cases in both groups, in which the examination of the language outcome was not feasible due to a persistently decreased vigilance. The threshold for the differentiation between GTR and STR was >95% of the initial tumor volume. The percentages of iMRIs were calculated based on the period in which an iMRI was available at the department (EOR = extent of resection, GTR = gross total resection, STR = subtotal resection, iMRI = intraoperative MRI).
